# Supplementary material for: Towards the Automatic Classification of Avian Flight Calls for Bioacoustic Monitoring
Source: PubMed Central journal article supplement (PMC5120805; doi:10.1371/journal.pone.0166866), 2016-11-23
Supplement: pone.0166866.s001.pdf [file pone.0166866.s001.pdf]

## S1 Table. CLO-43SD Species List.

Table 1: Full name, abbreviation, and number of instances of each species in the CLO-43SD dataset.

| Name                         | Abbreviation | Instances |
|------------------------------|--------------|-----------|
| Magnolia Warbler             | MAWA         | 1256      |
| Black-throated Green Warbler | BTNW         | 376       |
| Nashville Warbler            | NAWA         | 351       |
| American Redstart            | AMRE         | 336       |
| Ovenbird                     | OVEN         | 323       |
| Tennessee Warbler            | TEWA         | 269       |
| Black-throated Blue Warbler  | BTBW         | 224       |
| Grace’s Warbler              | GRWA         | 212       |
| Yellow-rumped Warbler        | YRWA         | 196       |
| Hooded Warbler               | HOWA         | 193       |
| Chestnut-sided Warbler       | CSWA         | 191       |
| Cape May Warbler             | CMWA         | 172       |
| Palm Warbler                 | PAWA         | 170       |
| Blackburnian Warbler         | BLBW         | 86        |
| Orange-crowned Warbler       | OCWA         | 78        |
| Bay-breasted Warbler         | BBWA         | 73        |
| Northern Parula              | NOPA         | 67        |
| Yellow Warbler               | YEWA         | 63        |
| Virginia’s Warbler           | VIWA         | 60        |
| Connecticut Warbler          | CONW         | 59        |
| Pine Warbler                 | PIWA         | 58        |
| Lucy’s Warbler               | LUWA         | 55        |
| Blackpoll Warbler            | BLPW         | 52        |
| Northern Waterthrush         | NOWA         | 51        |
| Common Yellowthroat          | COYE         | 50        |
| Prairie Warbler              | PRAW         | 45        |
| Worm-eating Warbler          | WEWA         | 42        |
| Blue-winged Warbler          | BWWA         | 40        |
| Golden-winged Warbler        | GWWA         | 33        |
| Golden-cheeked Warbler       | GCWA         | 29        |
| Hermit Warbler               | HEWA         | 29        |
| Prothonotary Warbler         | PROW         | 25        |
| Black-and-white Warbler      | BAWW         | 24        |
| Black-throated Gray Warbler  | BTYW         | 22        |
| Cerulean Warbler             | CERW         | 18        |
| Townsend’s Warbler           | TOWA         | 18        |
| Yellow-throated Warbler      | YTWA         | 16        |
| Red-faced Warbler            | RFWA         | 13        |
| Canada Warbler               | CAWA         | 12        |
| Louisiana Waterthrush        | LOWA         | 11        |
| Wilson’s Warbler             | WIWA         | 10        |
| Colima Warbler               | COLW         | 10        |
| Kentucky Warbler             | KEWA         | 10        |
